# Supplementary material
Source: PubMed Central journal article supplement (PMC8449315)
Supplement: pnas.2106645118.sapp.pdf [file pnas.2106645118.sapp.pdf]

1 **Supplementary Information**

2 **Eye contact marks the rise and fall of shared attention in conversation**

3 Sophie Wohltjen & Thalia Wheatley

4

5

6

7

8

9

10

11

12

13

14

15

16

17

18

19

20

21

22

23

24

25

26

27

28 ***The relationship between pupil size and pupillary synchrony as a function of variance***

29 The Multi-level Vector Auto-regression (mlVAR) analysis revealed a positive contemporaneous relationship  
30 with pupil size and pupillary synchrony, such that the pupil dilations of conversation partners tended to  
31 become more synchronous the larger their pupil size. This result could potentially be explained by less  
32 variance at larger pupil sizes artificially inflating synchrony scores. To investigate this, we divided the  
33 pupillary time series for each conversation partner into one-second windows. For each of these windows,  
34 we measured 1) mean pupil size and 2) amount of variance in the pupillary signal. We then correlated pupil  
35 size with pupil variance in these windows for each participant. A one-sample t-test revealed that the  
36 distribution of the resulting pearson's R values was significantly negatively skewed from zero (M R value =  
37 -0.26, SD = 0.22;  $t(93) = -11.29$ ,  $p < 0.001$ : i.e., greater variance at smaller pupil sizes).

38  
39 To test whether this difference in variance across pupil size accounted for the observed positive relationship  
40 between pupil size and pupillary synchrony, we created 94 simulated "pupillary" time series (equal to the  
41 94 participants in our study) using a random walk model that sampled points within the same size range  
42 and standard deviation of our true pupillary data (M size = 0.005; SD = 0.15; size range = -3.75 – 1.86; see  
43 supplementary figure 1A). We then randomly added noise to these time series based on the probability in  
44 the real data of a given amount of variance (variance ranged from 0 to 2.47) at a given pupil size. With this  
45 addition of noise, we confirmed that the simulated data had the same significant negative relationship  
46 between pupil size and pupil variance as the real pupil data (M R value = -0.03, SD = 0.04;  $t(93) = -7.26$ ,  $p$   
47  $< 0.001$ ; supplementary figure 1B). We then tested whether this simulated data showed the same  
48 relationship between pupil size and inverse DTW cost (synchrony) as we observed with the real pupil data.  
49 There was no such relationship between pupil size and synchrony for the simulated data (M R value 0.002,  
50 SD=0.14;  $t(93) = 0.16$ ,  $p = 0.87$ ; supplementary figure 1C), suggesting that amount of variance alone cannot  
51 fully explain the relationship observed between pupil size and pupillary synchrony in our participants.

52

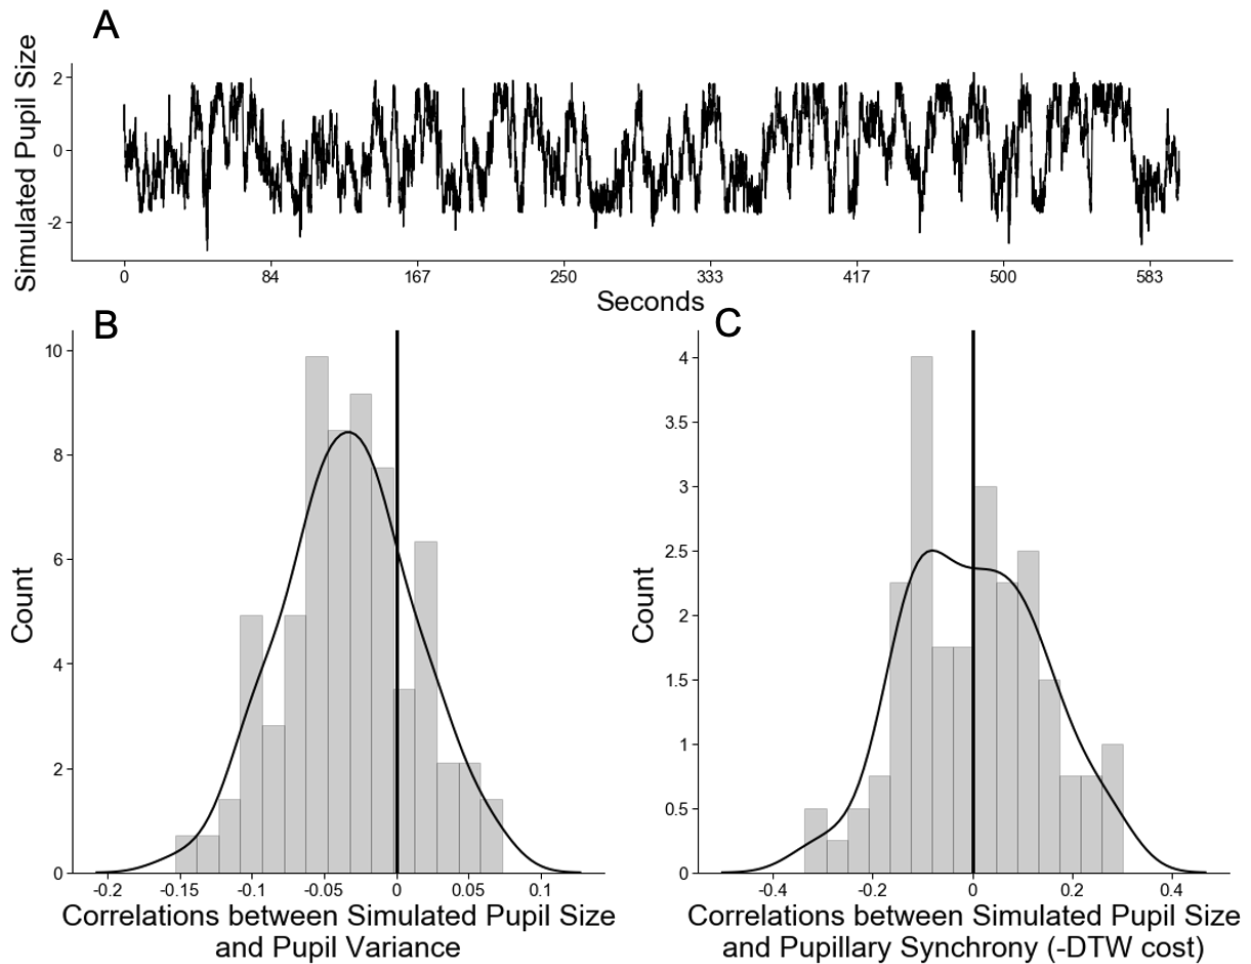

53

54 *Supplementary Figure 1. A)* Example of a simulated pupillary time series using a random walk model with  
 55 added noise based on pupil size for a single subject; **B)** Distribution of pearson's R values obtained by  
 56 correlating simulated pupil size with simulated pupil variance, with a black vertical line drawn at zero. This  
 57 distribution was significantly negatively skewed from zero ( $p < 0.001$ ). **C)** Distribution of pearson's R values  
 58 obtained by correlating simulated pupil size with simulated pupillary synchrony. This distribution was not  
 59 significantly skewed from zero ( $p = 0.87$ ), suggesting that differences in variance do not solely explain the  
 60 relationship between pupillary synchrony and pupil size in our true data.

61

### 62 **Calculating the fluctuations of synchrony around eye contact over a range of timescales**

63 In the main text, we report the nine seconds surrounding the onsets and offsets of eye contact. This choice  
 64 was motivated by first plotting the fluctuations of synchrony around eye contact at a range of time series  
 65 lengths, and noting that regardless of length, a fluctuation of around nine seconds surrounding eye contact

66 emerged. Supplementary figure 2 illustrates this effect, depicting synchrony time series surrounding eye  
67 contact at three different time series lengths.  
68

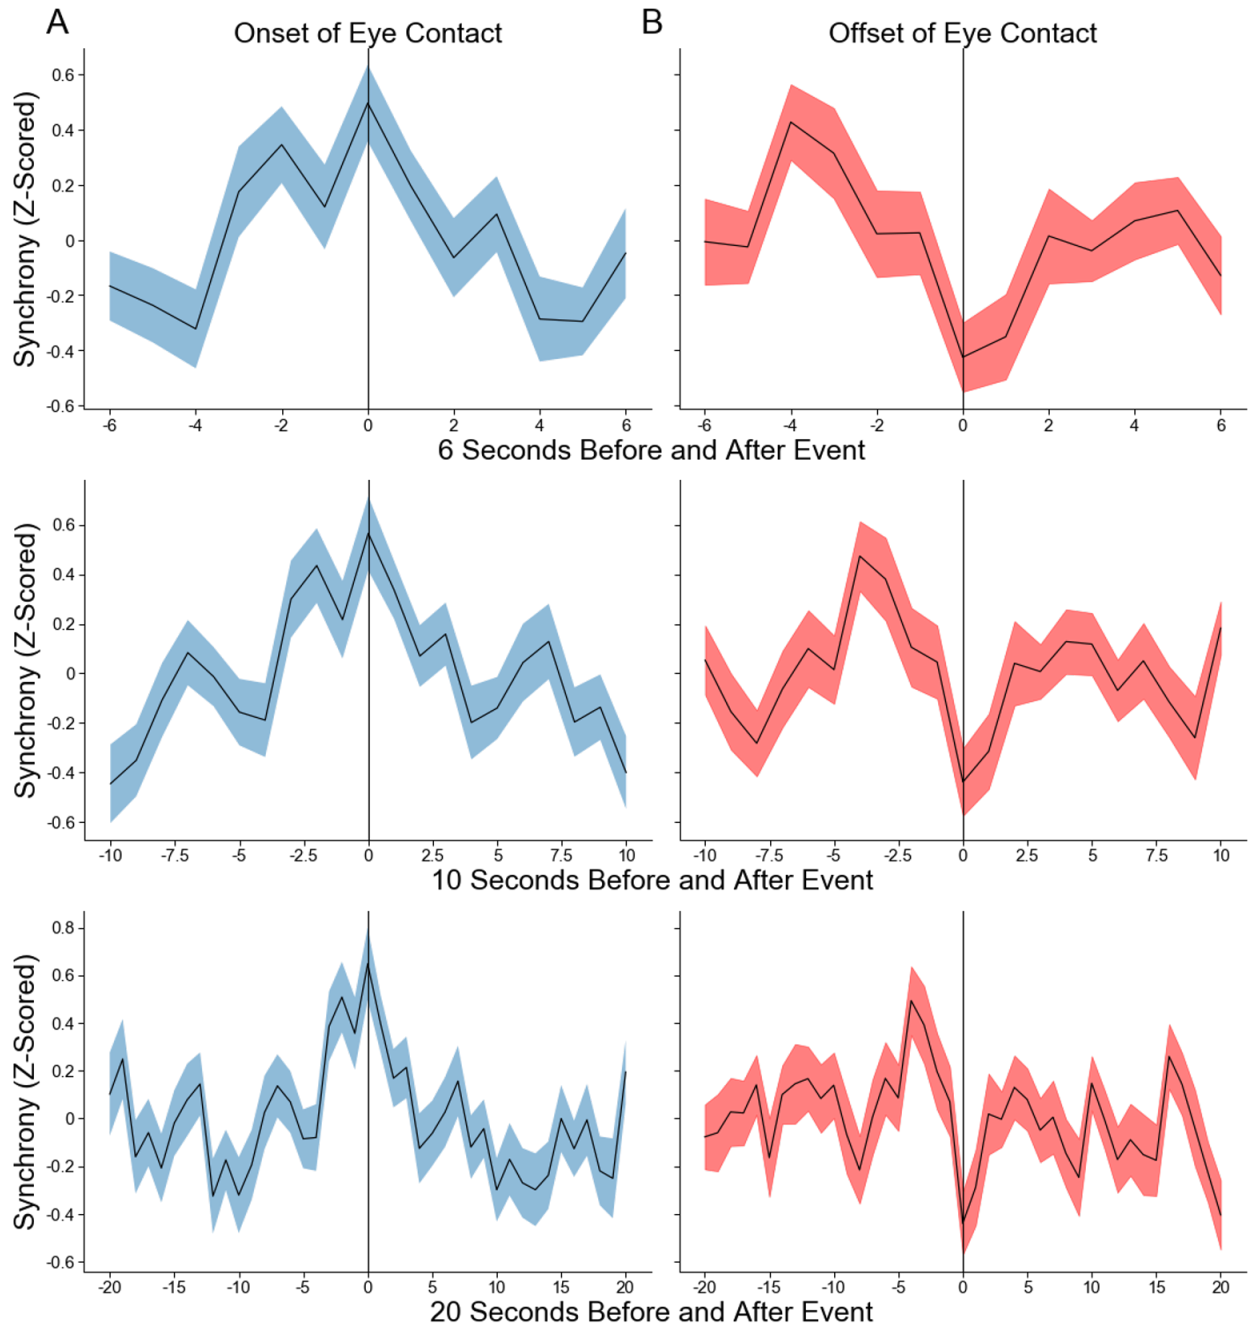

69  
70 *Supplementary Figure 2.* Synchrony curves surrounding the **A)** onset and **B)** offset of eye contact at a range  
71 of timescales. Regardless of the length of time used to compute each synchrony curve, we found that a  
72 nine-second parabolic fluctuation around the onset and offset of eye contact emerged.

73 **Controlling for naturalistic data issues in event-related analysis**

74 Each dyad had a unique time series of eye contact corresponding to their natural behavior during their  
75 conversation. Allowing eye contact “events” to vary freely provided two potential challenges for event-  
76 related analyses. First, multiple instances of eye contact occurring closely in time could cause issues when,  
77 for example, dyads made eye contact, broke it, and then made it again a second later. In our original  
78 analysis, these two instances of eye contact would have corresponding synchrony time series that  
79 overlapped with one another, but would both be included in the analysis. Second, dyads could vary widely  
80 in how much eye contact they made, with some dyads making very little, thereby potentially reducing the  
81 reliability of their average pupillary fluctuation around eye contact. To investigate the potential impact of  
82 these two data issues on our original result, we conducted an analysis that included only instances of eye  
83 contact that were spaced at least four seconds apart and accepted only dyads who had at least 30 of these  
84 more widely-spaced moments of eye contact. Doing so did not change any of the results reported in the  
85 main text that used all the data: a quadratic contrast remained the best fit for dyads’ eye contact onset  
86 synchrony curves ( $\beta = -0.47, t = -2.88, CI = -0.8 - -0.15, p = 0.004$ ) and for dyads’ eye contact offset  
87 synchrony curves ( $\beta = 0.59, t = 3.65, CI = 0.27 - 0.91, p < 0.001$ ; supplementary figure 3).

88

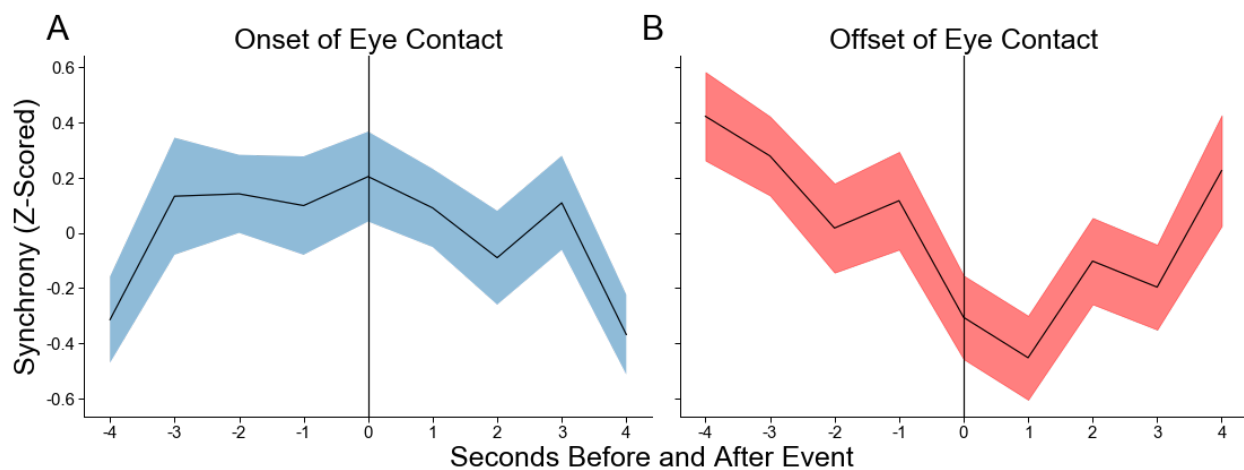

89

90 *Supplementary Figure 3.* Analysis plots limited to data in which eye contact events were spaced >4  
91 seconds. **A)** Time series of synchrony in the four seconds leading up to and following the onset and **B)**  
92 offset of eye contact.

93

94 We chose 30 trials as our minimum because it was the most stringent threshold that still retained at least  
95 two-thirds of dyads. However, to ensure our result was not due to an arbitrary threshold choice, we  
96 computed synchrony curves at a range of trial minimums (20-45) and found that, regardless of the  
97 threshold, the results were consistent (for onset,  $\beta$  ranged from -0.84 to -0.41,  $t$  ranged from -3.57 to -2.88,  
98  $p$  ranged from 0.0004 to 0.02; for offset,  $\beta$  ranged from 0.42 to 1.3,  $t$  ranged from 2.02 to 4.89,  $p$  ranged  
99 from  $< 0.0001$  to 0.04). Synchrony values for the full range of minimum trial thresholds at the onset and  
100 offset of eye contact are plotted in supplementary figure 4.

101

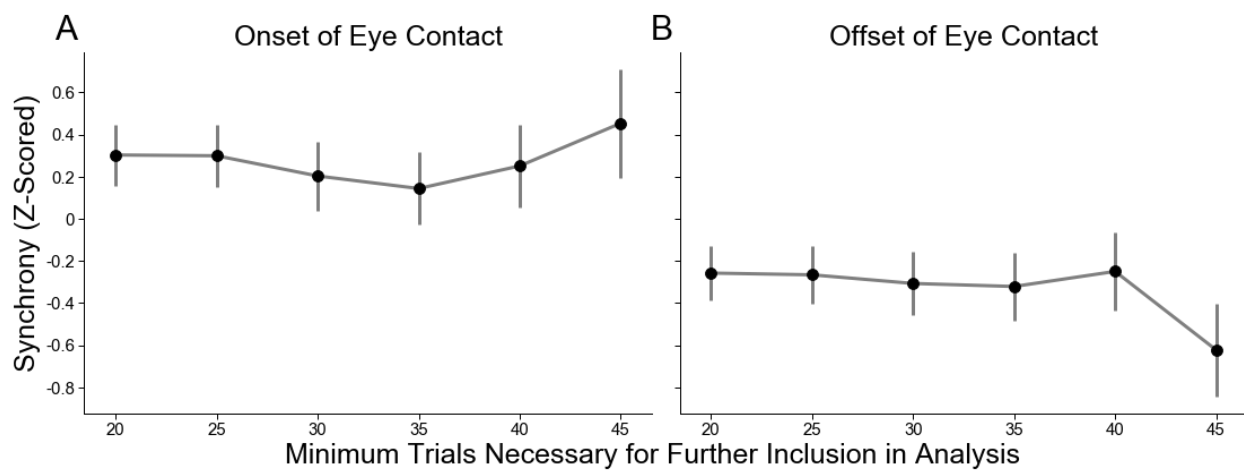

102

103 *Supplementary Figure 4. A)* Line graph depicting average synchrony values at the onset and **B)** offset of  
104 eye contact at a range of minimum trial thresholds. All error bars plotted depict standard error. Our original  
105 result —that eye contact peaks at the onset of eye contact and declines until the offset of eye contact —  
106 was robust to these additional controls.

107

### 108 ***Examining pupillary synchrony including instances of eye contact lasting less than one second***

109 The 1hz sampling rate used to compute pupillary synchrony necessarily excluded a large number of brief  
110 (<1 second) eye contact events from our analysis (M number of instances excluded = 117.28, SD = 49.72).  
111 We tested whether these brief instances of eye contact also produced fluctuations of pupillary synchrony  
112 similar to the longer (>1 second) instances in the primary analysis.

113

114 Capturing brief instances of eye contact required an increase in the sampling rate of pupillary synchrony.  
115 In order to ensure that any change in our original pupillary synchrony curves was the result of the new  
116 inclusion of brief instances of eye contact and not the change in our pupillary synchrony sampling  
117 window, we calculated pupillary synchrony in one-second increments, but used a 250ms rolling window  
118 (250ms is the shortest duration of an eye fixation<sup>1</sup>). In this way, the DTW algorithm still assessed the  
119 optimal warping path over a larger window (1 minute), but recomputed that path every 250ms making it  
120 additionally sensitive to fluctuations associated with brief eye contact. Because of the rolling window,  
121 there was no longer one specific time point that captured the onset of an instance of eye contact, there  
122 were five. To try to get a more accurate "onset" or "offset" using the rolling window, we assigned five  
123 synchrony curves – corresponding to the five samples in which the onset or offset was measured – to  
124 each instance of eye contact.

125

126 Consistent with the results reported in the main text, the model predicting the onset of eye contact was  
127 significant ( $f(35,1656) = 3.78$ ,  $R^2 = 0.05$ ,  $p < 0.001$ ), with a quadratic contrast showing the best fit for  
128 dyads' pupillary synchrony curves ( $\beta = -1.11$ ,  $t = -7.81$ ,  $CI = -1.39 - -0.83$ ,  $p < 0.001$ ). The model  
129 predicting the offset of eye contact was also significant ( $f(35,1656) = 2.31$ ,  $R^2 = 0.03$ ,  $p < 0.001$ ), with a  
130 linear contrast showing the best fit for dyads' pupillary synchrony curves ( $\beta = -0.97$ ,  $t = -6.75$ ,  $CI = -$   
131  $1.25 - -0.69$ ,  $p < 0.001$ ; supplementary figure 5A and 5B).

132

133 .

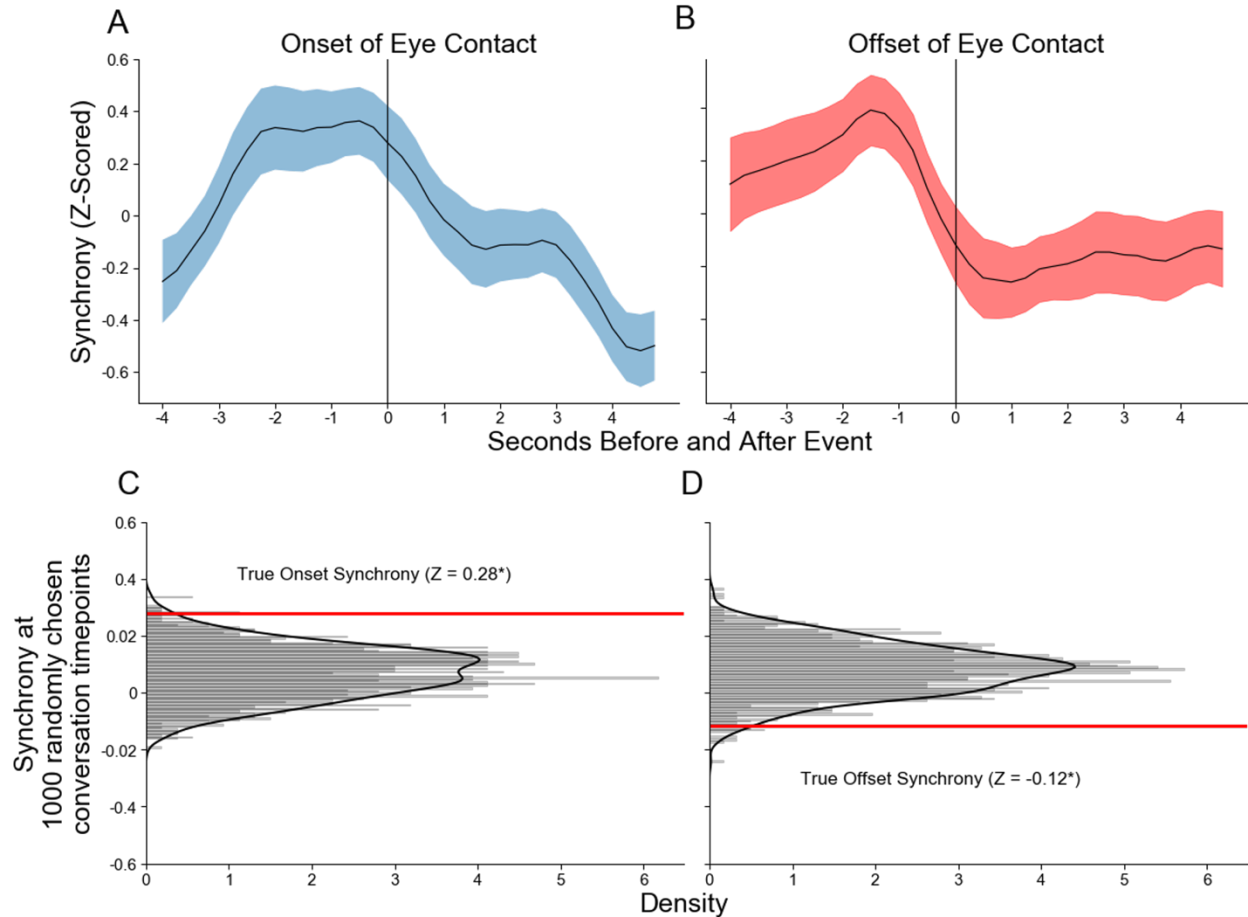

134

135 *Supplementary Figure 5.* Event-related analysis for moments of eye contact lasting 250ms or longer, with  
 136 pupillary synchrony calculated in a rolling window of one-second segments with 250ms of overlap. **A)** Time  
 137 series of pupillary synchrony in the four seconds leading up to and following the onset and **B)** offset of eye  
 138 contact. **C)** Results of two permutation tests comparing the onset and **D)** offset of eye contact to 1000,  
 139 randomly chosen, nine-second moments in each conversation, per participant. The distributions depicted  
 140 above were created by taking the pupillary synchrony value at the “onset” and “offset” point (position 5) of  
 141 each randomly chosen moment in the conversation. The true pupillary synchrony values for the onset and  
 142 offset of eye contact are represented by the red horizontal lines in each figure. As in the original analysis,  
 143 pupillary synchrony at the onset and offset of eye contact is significantly higher and lower, respectively,  
 144 than would be expected by chance.

145

146 To see whether pupillary synchrony at the onset and offset of eye contact was higher or lower than would  
 147 be expected at any other point in the conversation, we again compared true eye contact onsets and offsets



148 to a randomly sampled (using python's "random" package), equal number of moments in the conversation  
149 where eye contact was not made, creating "pseudo onsets" and "pseudo offsets." (see results in main text  
150 for full description of this analysis). We found that synchrony at the onset and offset of eye contact, including  
151 brief eye contact, was significantly higher and lower, respectively, than would be expected at any other  
152 point in the conversation (onset  $Z = 0.28$ ,  $p=0.013$ ; offset  $Z = -0.12$ ,  $p = 0.018$ ; figure 5C and 5D).

### 153 ***Investigating the fluctuations of pupillary synchrony around non-mutual eye contact***

154 Our main finding was that pupillary synchrony peaked at the onset of eye contact and then immediately  
155 began to decline until reaching its nadir at the offset of eye contact. We tested whether pupillary  
156 synchrony also fluctuates around non-mutual eye contact — when one individual gazes at their partner's  
157 eyes, but their partner does not reciprocate. To perform this analysis, we computed DTW (as an inverse  
158 measure of pupillary synchrony) around each instance of non-mutual eye contact, following the method  
159 described in the main text (see methods: event-related analysis).

160

161 Specifically, we computed a linear model predicting the average pupillary synchrony curve per dyad and  
162 specifying planned contrasts for how synchrony might vary over time. The model for the offset of non-mutual  
163 eye contact was not significant ( $f(8,837) = 0.36$ ,  $R^2 = 0.003$ ,  $p = 0.9$ ; see figure 6B). The model for the onset  
164 of non-mutual eye contact was significant ( $f(8,837) = 2.15$ ,  $R^2 = 0.01$ ,  $p = 0.02$ ; see supplementary figure  
165 6A). However, this fit was in the opposite direction of what we observed with mutual eye contact and did  
166 not survive permutation testing. Permutation testing involved randomly sampling an equal number of  
167 moments in the conversation where eye contact was not made, creating "pseudo onsets" and "pseudo  
168 offsets" (see results in main text for full description of this analysis). Pupillary synchrony at the onset or  
169 offset of non-mutual eye contact was not significantly higher or lower than would be expected at any other  
170 point in the conversation (onset  $Z = -0.06$ ,  $p=0.69$ ; offset  $Z = -0.08$ ,  $p = 0.77$ ; figure 6C and 6D). This result  
171 suggests that the fluctuations of synchrony around mutual eye contact are unique to mutual eye contact.  
172 One person looking at their partner's eyes is not enough to create reliable changes in pupillary synchrony.  
173 We note that because non-mutual eye gaze involves a gaze shift, this analysis further suggests that gaze

174 shifts alone cannot account for the relationship observed between mutual eye contact and pupillary  
175 synchrony.  
176

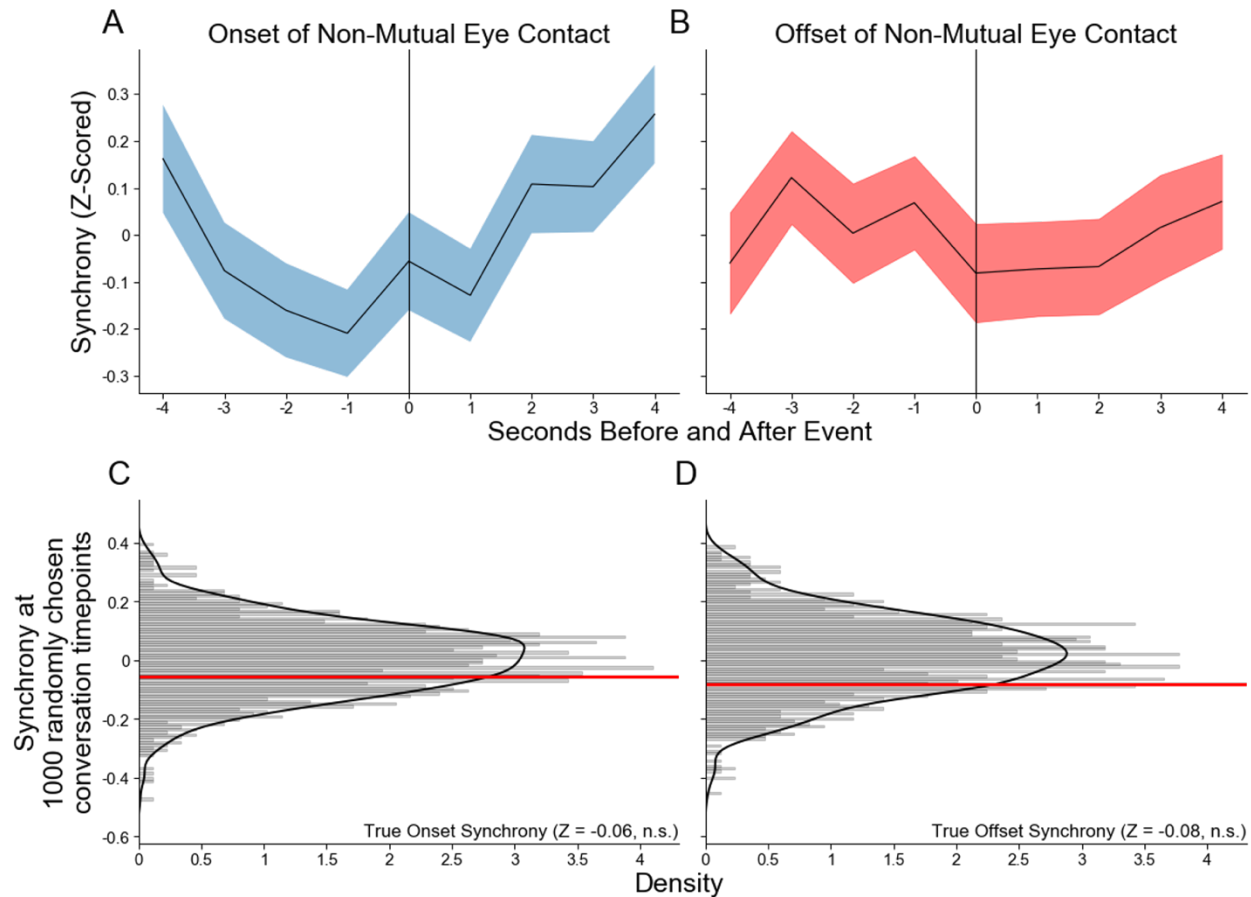

177  
178 *Supplementary Figure 6.* Event-related analysis for moments of *non-mutual* eye contact. **A**) Timeseries of  
179 synchrony in the four seconds leading up to and following the onset and **B**) offset of non-mutual eye contact.  
180 **C**) Results of two permutation tests comparing the onset and **D**) offset of non-mutual eye contact to 1000,  
181 randomly chosen, nine-second moments in each conversation, per participant. The distributions depicted  
182 above were created by taking the pupillary synchrony value at the “onset” and “offset” point (position 5) of  
183 each randomly chosen moment in the conversation. The true pupillary synchrony values for the onset and  
184 offset of eye contact are represented by the red horizontal lines in each figure. Pupillary synchrony at the  
185 onset and offset of non-mutual eye contact is not significantly higher or lower than would be expected by  
186 chance.  
187

188 ***Permutation testing to verify the relationship between eye contact, pupillary synchrony, and***  
189 ***conversational engagement***

190 Eye contact and pupillary synchrony were significantly and positively predictive of dyads' mean reported  
191 conversational engagement. Further, eye contact marginally moderated these effects such that, when  
192 dyads *were not* making eye contact, synchrony and engagement were positively related, but when dyads  
193 *were* making eye contact, this positive relationship was reversed. However, these main effects and  
194 interactions were small (eye contact main effect  $\beta = 0.028$ ; synchrony main effect  $\beta = 0.012$ ; interaction  
195 effect  $\beta = -0.017$ ). To further test the reliability of these effects, we permuted our data within and between  
196 subjects 5000 times and compared our true effects to null distributions created by those permutations. For  
197 these tests, within-subjects permutations consisted of shuffling the eye contact and synchrony time series  
198 for each dyad and computing the relationship between these shuffled time series and dyads' mean  
199 engagement. Between-subjects permutations consisted of shuffling fully intact eye contact and synchrony  
200 time series between different dyads (e.g. synchrony from dyad A and eye contact from dyad B is assigned  
201 to dyad C) and computing the relationship with engagement for these pseudo-dyads.

202

203 *Eye Contact Main Effect*

204 The relationship between eye contact and reported engagement (true  $\beta = 0.028$ ,  $p = 0.006$ ) was robust to  
205 both within-subjects ( $p = 0.002$ ) and between-subjects ( $p = 0.02$ ) permutation tests (figure 7A). This  
206 suggests that eye contact is a robust predictor of conversational engagement, above and beyond random  
207 variation in the eye contact time series and in a way that is specific to the individual structure of a dyad's  
208 conversation. The finding that this effect is robust to a between-subjects permutation test suggests that  
209 dyads are not merely adhering to global conversation norms when employing eye contact, but making it as  
210 needed to increase engagement in their unique conversations.

211

212 *Pupillary Synchrony Main Effect*

213 The relationship between pupillary synchrony and reported engagement (true  $\beta = 0.012$ ,  $p = 0.05$ ) was  
214 robust to a within-subjects permutation test ( $p = 0.02$ ), suggesting that pupillary synchrony predicts  
215 conversational engagement above and beyond random variation in the synchrony time series. However,

216 this effect was not robust to a between-subjects permutation test ( $p = 0.56$ ; figure 7B). The lack of a  
217 between-subjects effect was due, at least in part, to a linear trend across dyads to become both more  
218 engaged and more synchronous over the course of a conversation. This suggests that, as dyads conversed,  
219 they increased shared attention which corresponded to a similar increase in reported engagement.

220

### 221 *Interaction between Eye Contact and Pupillary Synchrony on Engagement*

222 The marginal interaction between pupillary synchrony and eye contact on reported engagement (true  $\beta = -$   
223  $0.017$ ,  $p = 0.08$ ) was robust to a within-subjects permutation test ( $p = 0.04$ ), suggesting that this interaction,  
224 while marginal, predicted conversational engagement above and beyond random variation in synchrony  
225 and eye contact time series. However, this effect was not robust to a between-subjects permutation test ( $p$   
226  $= 0.12$ ; figure 7C) due, at least in part, to pupillary synchrony and reported engagement being correlated  
227 across all dyads. Thus, although pupillary synchrony and engagement are inversely correlated *during* eye  
228 contact, outside of these moments, pupillary synchrony and reported engagement increase together over  
229 the course of the conversation.

230

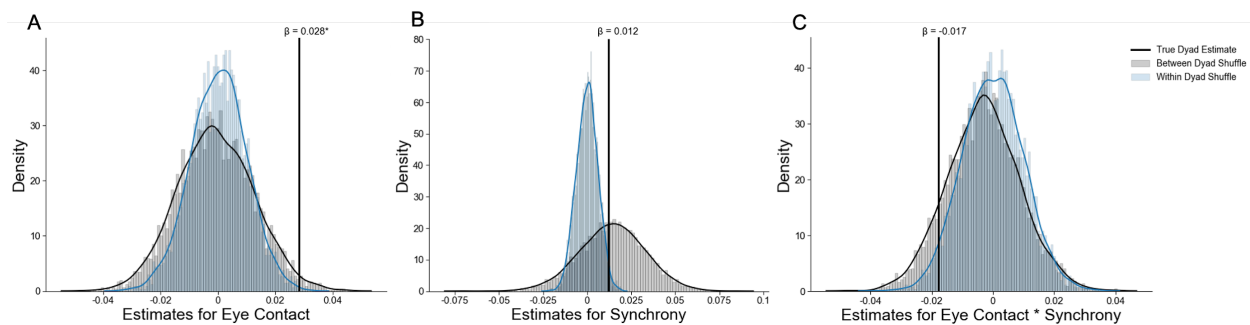

231

232 *Supplementary Figure 7. Results of both within- and between-subjects permutation tests testing A) the*  
233 *positive relationship between eye contact and reported engagement, B) the positive relationship between*  
234 *pupillary synchrony and reported engagement, and C) the interaction between eye contact and synchrony*  
235 *on reported engagement against null-distributions created by shuffling eye contact and synchrony time*  
236 *series 5000 times both within- and between- dyads. The relationship between eye contact and engagement*  
237 *was robust to both within- and between- subjects permutation tests. The relationship between pupillary*  
238 *synchrony and engagement and the interaction between eye contact and pupillary synchrony on*

239 engagement were robust to within-subjects permutation tests. However, we found that global increases in  
240 both shared attention and mean reported engagement over the course of dyads' conversations produced  
241 non-significant between-subjects permutation tests for both the relationship between pupillary synchrony  
242 and engagement and the interaction between synchrony and eye contact on engagement.

### 243 **References**

- 244 1. Rogers, S.L., Speelman, C.P., Guidetti, O., & Longmuir, M. (2018). Using dual eye-tracking to  
245 uncover personal gaze patterns during social interaction. *Scientific Reports*, 8, 1-9.  
246 DOI:10.1038/s41598-018-22726-7  
247
